# Supplementary material
Source: PubMed Central journal article supplement (PMC3386606)

## SUPPLEMENTAL FIGURES

Figure S1. **Arthritis progression is affected in K/BxN.*Foxp3*<sup>gfp</sup> mice but progresses normally in B6.*Foxp3*<sup>gfp</sup> in response to K/BxN serum transfer.** (A) Arthritis progression is delayed in K/BxN.*Foxp3*<sup>gfp</sup> heterozygote females. Average net ankle thickness followed over a period of time in K/BxN.*Foxp3*<sup>gfp/wt</sup> heterozygotes and littermate controls. Data represent two independent experiments (n=6 mice/group). (B) B6.*Foxp3*<sup>gfp</sup> mice are not protected from K/BxN serum induced arthritis. Mean ankle thickness measurements of *Foxp3*<sup>gfp</sup> or control littermates injected i.p. with 100  $\mu$ L of K/BxN serum on day 0 and 2. Measurements were taken at day 0 and 14 days post injection. Data represent two independent experiments (n=3 mice per group per experiment).

Figure S2. **Expression of specific T-helper subset genes in Tconv cells from *Foxp3*<sup>gfp</sup> vs *Foxp3*<sup>igfp</sup> B6 and NOD mice.** Vis-à-vis comparison of Th1, Th2, Th17 and TFH gene signatures in Tconv cells from B6 and NOD *Foxp3*<sup>gfp</sup> or *Foxp3*<sup>igfp</sup> mice. Canonical Th-subset specific genes are highlighted in red.

## SUPPLEMENTAL EXPERIMENTAL PROCEDURES

### ***K/BxN serum induced arthritis and arthritis evaluation***

Arthritis was induced by i.p. injection of 100–150  $\mu$ l of pooled serum from 8-wk-old K/BxN mice on days 0 and 2. Ankle thickness was measured with a caliper (J15 Blet micrometer). Each limb was scored on a scale from 0 (no observable swelling) to 3 (severe inflammation), and the four-limb scores were summed to yield a clinical index (maximum 12 points).

Figure S1

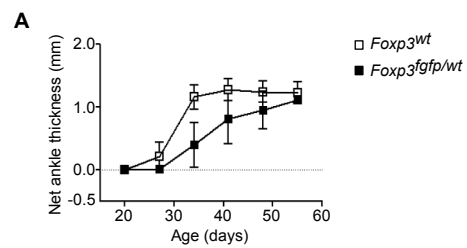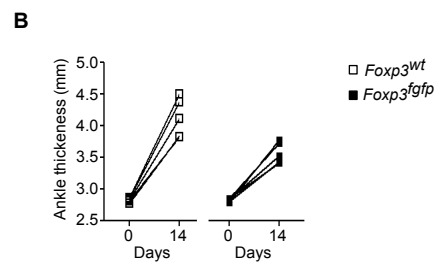

Figure S2

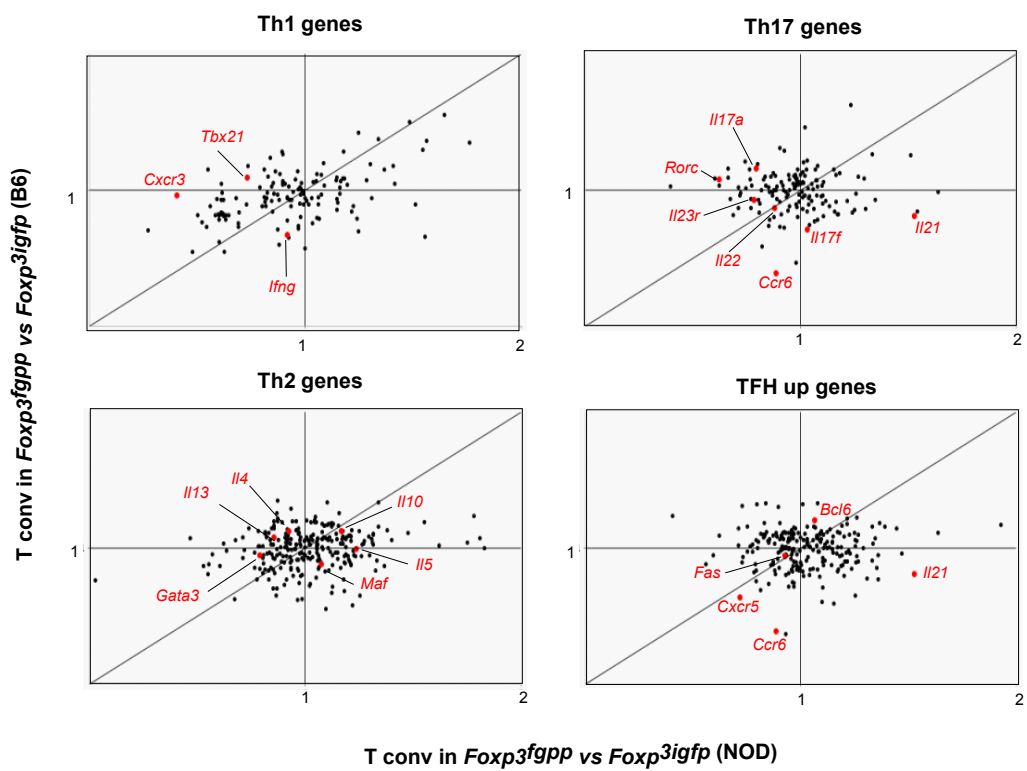

Supplement: NIHMS377250-supplement-01.pdf [file NIHMS377250-supplement-01.pdf]
